# Supplementary material for: Virtual Home Care for Patients With Acute Illness
Source: PubMed Central journal article supplement (PMC11600231; doi:10.1001/jamanetworkopen.2024.47352), 2024-11-26
Supplement: jamanetwopen-e2447352-s002.pdf [file jamanetwopen-e2447352-s002.pdf]

## Data Sharing Statement

Banerjee. Virtual Home Care for Patients with Acute Illness. *JAMA Netw Open*. Published November 26, 2024. doi:10.1001/jamanetworkopen.2024.47352

### Data

**Data available:** No
